# Supplementary material for: Synthesis and physical properties of tris(dialkylamino)cyclopropenium dicyanamide ionic liquids
Source: Royal Society of Chemistry journal article supplement (doi:10.1039/c8ra05558k), 2018-01-01
Supplement: c8ra05558k1.pdf [file c8ra05558k1.pdf]

## Supplementary material

# Synthesis and physical properties of tris(dialkylamino)cyclopropenium dicyanamide ionic liquids

Owen J. Curnow,\* Matthew I. J. Polson, Kelvin J. Walst and Ruhamah Yunis

*School of Physical and Chemical Sciences, University of Canterbury, Private Bag 4800, Christchurch 8041, New Zealand. E-mail: [owen.curnow@canterbury.ac.nz](mailto:owen.curnow@canterbury.ac.nz); Tel: +64 3 369 4239.*

| Contents                                                                                                                                              | Page |
|-------------------------------------------------------------------------------------------------------------------------------------------------------|------|
| <b>Starting materials</b>                                                                                                                             | 2    |
| <b>Synthesis of TDAC DCA salts</b>                                                                                                                    | 2    |
| Table 1S. Density data for TDAC DCA ionic liquids.                                                                                                    | 5    |
| Table 2S. Density fitting parameters for TDAC DCA ILs.                                                                                                | 5    |
| Table 3S. Molar volumes (mL mol <sup>-1</sup> ) for TDAC DCA ILs.                                                                                     | 6    |
| <b>Fig. 1S.</b> Density parameter a versus cation molecular weight for TDAC DCA ILs.                                                                  | 6    |
| <b>Fig. 2S.</b> Density parameter b versus cation molecular weight for TDAC DCA ILs.                                                                  | 7    |
| <b>Fig. 3S.</b> d (the intercept of ln( $\rho$ ) versus <i>T</i> plots) versus cation molecular weight for TDAC DCA ILs.                              | 7    |
| Table 4S. Viscosity data for TDAC DCA ILs.                                                                                                            | 8    |
| Table 5S. Viscosity fit parameters for TDAC DCA ILs.                                                                                                  | 8    |
| <b>Fig. 4S.</b> A fragility plot for the salts with observed glass transition temperatures.                                                           | 9    |
| Table 6S. Viscosities of non-TDAC cations with DCA.                                                                                                   | 9    |
| Table 7S. Conductivity data for TDAC DCA ILs.                                                                                                         | 10   |
| Table 8S. Conductivity fit parameters for TDAC DCA ILs.                                                                                               | 10   |
| <b>Fig. 5S.</b> Plot of Log(conductivity) versus MW with a linear fit.                                                                                | 11   |
| Table 9S. Walden parameters for TDAC DCA ILs                                                                                                          | 11   |
| <b>X-ray crystallography</b>                                                                                                                          | 12   |
| Table 10S. Crystallographic data for <b>3a</b> .H <sub>2</sub> O and <b>3c</b> .                                                                      | 12   |
| Table 11S. Bond lengths (Å) and angles (°) for [C <sub>3</sub> (NMe <sub>2</sub> ) <sub>3</sub> ]DCA.H <sub>2</sub> O ( <b>3a</b> .H <sub>2</sub> O). | 13   |
| <b>Fig. 6S.</b> Illustration of one layer of <b>3a</b> .H <sub>2</sub> O and the cation environment.                                                  | 13   |
| Table 12S. Bond lengths for [C <sub>3</sub> (NPr <sub>2</sub> ) <sub>3</sub> ]DCA ( <b>3c</b> ).                                                      | 14   |
| Table 13S. Bond angles for [C <sub>3</sub> (NPr <sub>2</sub> ) <sub>3</sub> ]DCA ( <b>3c</b> ).                                                       | 14   |
| <b>References</b>                                                                                                                                     | 14   |

## Starting materials

### Bis(diisopropylamino)dibutylaminocyclopropenium chloride, $[C_3(N^iPr_2)_2NBu_2]Cl$

$C_3Cl_5H$  (5.17 g, 24.1 mmol) was stirred at 0 °C in dry dichloromethane (75 mL).  $HN^iPr_2$  (11.9 g, 118 mmol) added dropwise over 1 h followed by stirring for 2 h at 0 °C and then overnight at ambient temperature.  $HN^tBu_2$  (12.3 g, 95.0 mmol) was added dropwise over 1 h, followed by stirring for 2 h at 0 °C, then overnight at ambient temperature, then heated to reflux for 4 h. The dichloromethane was removed *in vacuo* and dilute NaOH added. The aqueous solution was washed with diethyl ether (3 x 75 mL). The solution was neutralized with aqueous HCl and the product extracted with dichloromethane (3 x 125 mL). Drying *in vacuo* yielded a colourless solid (5.77 g, 60%).  $^1H$  NMR (300 MHz,  $CDCl_3$ ): 3.79 (spt,  $^3J_{HH} = 13.8$ , 7.0 Hz, 4H,  $NCH(CH_3)_2$ ), 3.36 (t,  $^3J_{HH} = 7.9$  Hz, 4H,  $NCH_2$ ), 1.53 (m, 4H,  $NCH_2CH_2$ ), 1.30 (d,  $^3J_{HH} = 7.0$  Hz, 24H,  $NCH(CH_3)_2$ ), 1.23 (m, 4H,  $NCH_2CH_2CH_2$ ), 0.89 (t,  $^3J_{HH} = 7.90$  Hz, 6H,  $CH_2CH_3$ ).  $^{13}C$  NMR (75 MHz,  $CDCl_3$ ): 118.46 ( $C_1$ ), 117.49 ( $C_2$ ), 51.57 ( $NCH_2$ ), 51.50 ( $NCH(CH_3)_2$ ), 30.77 ( $NCH_2CH_2$ ), 21.99 ( $NCH(CH_3)_2$ ), 19.44 ( $N(CH_2)_2CH_2CH_3$ ), 13.67 ( $N(CH_2)_3CH_3$ ).  $ES^+$   $m/z$  364.3690 (100%,  $M^+$ ). Found: C, 67.83; H, 11.48; N, 10.50%. Calc. for  $C_{23}H_{46}N_3Cl \cdot 0.40H_2O$ : C, 67.83; H, 11.58; N, 10.32%.

**Bis(diethylamino)methoxycyclopropenium methylsulphate,  $[C_3(NEt_2)_2OMe]MeSO_4$ .** Dried bis(diethylamino)cyclopropenone (1.14 g, 6 mmol) was stirred with  $Me_2SO_4$  (0.98 mL, 8 mmol) for 2 h in an inert atmosphere. Solvent was removed *in vacuo*. The mixture was washed with dry diethyl ether several times to remove excess  $Me_2SO_4$  and cyclopropenone. This gave an orange viscous oil of  $[C_3(NEt_2)(OMe)]MeSO_4$  (1.46 g, 70%).  $^1H$  NMR (500 MHz,  $CDCl_3$ ):  $\delta$  4.19 (s, 3H,  $OCH_3$ ), 3.5 (s, 3H,  $CH_3SO_4$ ), 3.43 (q,  $^3J_{HH} = 7.3$  Hz, 8H,  $NCH_2CH_3$ ), 1.3 (t,  $^3J_{HH} = 7.25$  Hz, 12H,  $NCH_2CH_3$ ).

## Synthesis of TDAC DCA Salts

**Tris(dimethylamino)cyclopropenium dicyanamide,  $[C_3(NMe_2)_3]DCA$  (3a).**  $[C_3(NMe_2)_3]Cl$  (4.35 g, 21 mmol) was stirred with NaDCA (5.68 g, 64 mmol) in water (50 mL) at 40 °C overnight. The product was extracted with chloroform (3 x 10 mL). The solvent was removed *in vacuo* to yield a yellow solid (2.7 g, 54%).  $^1H$ ,  $^{13}C$  NMR and  $MS^+$  as for  $[C_3(NMe_2)_3]Cl$  with an additional peak in the  $^{13}C$  NMR due to DCA. Found: C, 55.64; H, 7.93; N, 33.63%. Calc. for  $C_{11}H_{18}N_6$  with 15% chloride salt: C, 55.89; H, 7.92; N, 33.58%.

**Tris(dipropylamino)cyclopropenium dicyanamide,  $[C_3(NPr_2)_3]DCA$  (3c).**  $[C_3(NPr_2)_3]Cl$  (7.69 g, 20.7 mmol) was stirred with aqueous NaDCA (3.73 g, 41.9 mmol) in water (100 mL). The product was extracted with dichloromethane (50 mL) and washed with water (3 x 100 mL). Additional aqueous NaDCA (1.85 g, 20.8 mmol) was added and the organic layer was then washed with water (4 x 100 mL) and dried *in vacuo* to yield a yellow liquid (11.5 g, 85%) which slowly crystallized.  $^1H$ ,  $^{13}C$  NMR and  $MS^+$  as for  $[C_3(NPr_2)_3]Cl$ . Found: C, 67.19; H, 10.57; N, 19.77%. Calc. for  $C_{23}H_{42}N_6 \cdot 0.6H_2O$ : C, 66.82; H, 10.53; N, 20.33%.  $Cl^-$  content: 314 ppm.

**Tris(dipentylamino)cyclopropenium dicyanamide,  $[C_3(NPent_2)_3]DCA$  (3e).**  $[C_3(NPent_2)_3]Cl$  (4.13 g, 7.66 mmol) was stirred with aqueous NaDCA (3.8 g, 43.1 mmol) in water (100 mL). The product was extracted with diethyl ether (200 mL), and additional NaDCA (6.1 g, 44.9 mmol) and water (100 mL) was added. The diethyl ether solution was then washed with water (3 x 100 mL) and dried *in vacuo* to yield an orange liquid (3.69 g, 85%).  $^1H$ ,  $^{13}C$  NMR and  $MS^+$  as for  $[C_3(NPent_2)_3]Cl$ . Found: C, 73.26; H, 11.58; N, 14.64%. Calc. for  $C_{35}H_{66}N_5 \cdot 0.16H_2O$ : C, 73.26; H, 11.65; N, 14.65%.  $H_2O$  content: 316 ppm.  $Cl^-$  content: 312 ppm.

**Tris(dihexylamino)cyclopropenium dicyanamide, [C<sub>3</sub>(NHex<sub>2</sub>)<sub>3</sub>]DCA (3f).** [C<sub>3</sub>(NHex<sub>2</sub>)<sub>3</sub>]Cl (3.85 g, 6.16 mmol) was stirred with NaDCA (2.5 g, 28.1 mmol) in water (50 mL). The product was extracted with dichloromethane (25 mL) and washed with water (50 mL). Additional NaDCA (2.5 g, 28.1 mmol) and water (100 mL) was added. Extracted with diethyl ether (100 mL), washed with water (4 x 100 mL) and dried *in vacuo* to yield an orange liquid (3.61 g, 89%). <sup>1</sup>H, <sup>13</sup>C NMR and MS<sup>+</sup> as for [C<sub>3</sub>(NHex<sub>2</sub>)<sub>3</sub>]Cl. Found: C, 75.31; H, 12.25; N, 12.72%. Calc. for C<sub>41</sub>H<sub>78</sub>N<sub>6</sub>: C, 75.17; H, 12.00; N, 12.83%. H<sub>2</sub>O content: 272 ppm. Cl<sup>-</sup> content: 1055 ppm.

**Tris(didecylamino)cyclopropenium dicyanamide, [C<sub>3</sub>(NDec<sub>2</sub>)<sub>3</sub>]DCA (3g).** [C<sub>3</sub>(NDec<sub>2</sub>)<sub>3</sub>]Cl (3.10 g, 3.23 mmol) was stirred with NaDCA (2.0 g, 22.5 mmol). Water (100 mL) was added and product extracted with diethyl ether (200 mL). Additional NaDCA (2.0 g, 22.5 mmol) and water (100 mL) was added. Diethyl ether solution was washed with water (3 x 100 mL) and dried *in vacuo* to yield an orange liquid (3.10 g, 97%). <sup>1</sup>H, <sup>13</sup>C NMR and MS<sup>+</sup> as for [C<sub>3</sub>(NDec<sub>2</sub>)<sub>3</sub>]Cl. Found: C, 78.61; H, 12.88; N, 8.51%. Calc. for C<sub>65</sub>H<sub>126</sub>N<sub>4</sub>S<sub>2</sub>O<sub>4</sub>F<sub>6</sub>: C, 78.72; H, 12.81; N, 8.47%. H<sub>2</sub>O content: 186 ppm. Cl<sup>-</sup> content: 369 ppm.

**Tris(butylmethylamino)cyclopropenium dicyanamide, [C<sub>3</sub>(NBuMe)<sub>3</sub>]DCA (4a).** [C<sub>3</sub>(NBuMe)<sub>3</sub>]Cl (5.30 g, 16.1 mmol) was stirred with NaDCA (3.65 g, 41.0 mmol) in water (100 mL). The product was extracted with chloroform (50 mL) washed with water (3 x 50 mL) ) and dried *in vacuo* to yield a yellow liquid (5.40 g, 93%). <sup>1</sup>H, <sup>13</sup>C NMR and MS<sup>+</sup> as for [C<sub>3</sub>(NBuMe)<sub>3</sub>]Cl with an additional peak due to DCA. Found: C, 66.33; H, 10.27; N, 23.19%. Calc. for C<sub>20</sub>H<sub>36</sub>N<sub>6</sub>: C, 66.63; H, 10.06; N, 23.31%. H<sub>2</sub>O content: 1139 ppm. Cl<sup>-</sup> content: 156 ppm.

**Tris(octadecylmethylamino)cyclopropenium dicyanamide, [C<sub>3</sub>(NC<sub>18</sub>Me)<sub>3</sub>]DCA (4b).** [C<sub>3</sub>(NC<sub>18</sub>Me)<sub>3</sub>]Cl (4.00 g, 4.35 mmol) was stirred with NaDCA (1.2 g, 13.5 mmol) in water (100 mL). The product was extracted with dichloromethane (100 mL), washed with water (3 x 100 mL) and dried *in vacuo* to yield a yellow solid (3.30 g, 80%). <sup>1</sup>H, <sup>13</sup>C NMR and MS<sup>+</sup> as for [C<sub>3</sub>(NC<sub>18</sub>Me)<sub>3</sub>]Cl. Found: C, 77.31; H, 12.90; N, 9.10%. Calc. for C<sub>62</sub>H<sub>120</sub>N<sub>6</sub>0.75H<sub>2</sub>O: C, 11.31; H, 12.71; N, 8.72%.

**Bis(diisopropylamino)dibutylaminocyclopropenium dicyanamide, [C<sub>3</sub>(N<sup>i</sup>Pr)<sub>2</sub>NBu<sub>2</sub>]DCA (5).**

[C<sub>3</sub>(N<sup>i</sup>Pr)<sub>2</sub>NBu<sub>2</sub>]Cl (0.300 g, 0.750 mmol) was stirred with NaDCA (0.350 g, 3.93 mmol) in water (50 mL). The product was extracted with chloroform (50 mL). Additional NaDCA (0.519 g, 5.83 mmol) in water (50 mL) was added. The chloroform was washed with water (3 x 50 mL) and dried *in vacuo* to yield a colourless solid (0.25 g, 78%). <sup>1</sup>H, <sup>13</sup>C NMR and MS<sup>+</sup> as for [C<sub>3</sub>(N<sup>i</sup>Pr)<sub>2</sub>NBu<sub>2</sub>]Cl. Found: C, 69.67; H, 10.76; N, 19.64%. Calc. for C<sub>25</sub>H<sub>46</sub>N<sub>4</sub>S<sub>2</sub>O<sub>4</sub>F<sub>6</sub>: C, 69.72; H, 10.77; N, 19.51%. Cl<sup>-</sup> content: 1176 ppm.

**Bis(dimethylamino)propylmethylaminocyclopropenium dicyanamide, [C<sub>3</sub>(NMe<sub>2</sub>)<sub>2</sub>(NPrMe)]DCA (8a).**

[C<sub>3</sub>(NMe<sub>2</sub>)<sub>2</sub>(OMe)]MeSO<sub>4</sub> (4.7 g, 18 mmol) was stirred with H<sub>2</sub>N(CH<sub>2</sub>CH<sub>2</sub>CH<sub>3</sub>) (18 mL, 23 mmol) in dry dichloromethane (5 mL) for 2 h in an inert atmosphere. Dichloromethane was removed *in vacuo*. The mixture was in dissolved water and the product was extracted with chloroform:ethanol 2:1 (3 × 30 mL). The solvent was removed *in vacuo* to give [C<sub>3</sub>(NMe<sub>2</sub>)<sub>2</sub>(N(CH<sub>2</sub>CH<sub>2</sub>CH<sub>3</sub>)H)]MeSO<sub>4</sub> (3.51 g, 59%) as a light yellow oil, which was then stirred with NaDCA (2.79 g, 14 mmol) in H<sub>2</sub>O (20 mL). The product was extracted with chloroform (3 × 30 mL). The solvent was removed *in vacuo* to give a yellow oil (3 g, 98%) of [C<sub>3</sub>(NMe<sub>2</sub>)<sub>2</sub>(N(CH<sub>2</sub>CH<sub>2</sub>CH<sub>3</sub>)H)]DCA. This was dried under vacuum overnight.

[C<sub>3</sub>(NMe<sub>2</sub>)<sub>2</sub>(N(CH<sub>2</sub>CH<sub>2</sub>CH<sub>3</sub>)H)]DCA (3 g, 10 mmol) was stirred with dry THF at -78 °C and *n*-BuLi (6.87 mL of 1.6 M, 11 mmol) was added drop wise in an inert atmosphere. Reaction mixture was stirred for 30 minutes and then allowed to warm to room temperature for another 30 minutes. Me<sub>2</sub>SO<sub>4</sub> (1.66 mL, 13 mmol) was

then added and the solution was stirred for another 30 minutes.  $\text{LiMeSO}_4$  was removed by filtration. THF was then removed *in vacuo*. The mixture was dissolved in water (50 mL) with NaDCA (1 g, 11 mmol) and the product was extracted with  $\text{CHCl}_3$  (3  $\times$  50 mL). The solvent was removed *in vacuo* to give a yellow oil (3 g, 96%).  $^1\text{H}$  NMR ( $\text{CDCl}_3$ , 400 MHz):  $\delta$  3.32 (t,  $^3J_{\text{HH}} = 8$  Hz, 2H,  $\text{NCH}_2$ ), 3.17 (s, 12H,  $\text{NCH}_3$ ), 3.15 (s, 3H,  $\text{NCH}_3$ ), 1.69 (m, 2H,  $\text{NCH}_2\text{CH}_2$ ), 0.94 (t,  $^3J_{\text{HH}} = 8$  Hz, 3H,  $\text{NCH}_2\text{CH}_2\text{CH}_3$ ).  $^{13}\text{C}\{^1\text{H}\}$  NMR ( $\text{CDCl}_3$ , 100 MHz):  $\delta$  118.88 (CN), 117.71 (equivalent ring C), 117.51 (unique ring C), 57.15 ( $\text{NCH}_2$ ), 42.49 ( $\text{N}(\text{CH}_3)_2$ ), 40.30 ( $\text{NCH}_3$ ), 21.06 ( $\text{NCH}_2\text{CH}_2$ ), 10.95 ( $\text{NCH}_2\text{CH}_2\text{CH}_3$ ). ESI MS:  $m/z$  196.1808 ( $\text{M}^+$ ). Anal. calcd for  $\text{C}_{13}\text{H}_{22}\text{N}_6 \cdot 0.75\text{H}_2\text{O}$ : C, 56.60; H, 8.58; N, 30.46. Found: C, 56.96; H, 8.07; N, 30.33. With water content of 793 ppm.

**Bis(dimethylamino)butylmethylaminocyclopropenium dicyanamide,  $[\text{C}_3(\text{NMe}_2)_2(\text{NBuMe})]\text{DCA}$  (8b).**

$[\text{C}_3(\text{NMe}_2)_2(\text{OMe})]\text{MeSO}_4$  (3.3 g, 13 mmol) was stirred with BuMeNH (1.9 mL, 17 mmol) in dry dichloromethane (5 mL) for 30 minutes in an inert atmosphere. Dichloromethane was removed *in vacuo*. The mixture was washed with dry diethyl ether several times to remove excess amine. The mixture was dissolved in water and the product was extracted with dichloromethane (3  $\times$  30 mL). The solvent was removed *in vacuo* to give  $[\text{C}_3(\text{NMe}_2)_2(\text{NBuMe})]\text{MeSO}_4$  (3.27 g, 80%) as a brown oil which was then stirred with NaDCA (2.7 g, 123 mmol) in  $\text{H}_2\text{O}$  (20 mL). The product was extracted with chloroform (3 $\times$ 30 mL) and the solvent was then removed *in vacuo* to give a brown oil (2.66 g, 95%).  $^1\text{H}$  NMR (400 MHz,  $\text{CDCl}_3$ ):  $\delta$  3.33 (t, 2H,  $^3J_{\text{HH}} = 8$  Hz,  $\text{NCH}_2$ ), 3.16 (s, 12H,  $\text{NCH}_3$ ), 3.14 s, 3H,  $\text{NCH}_3$ ), 1.63 (m, 2H,  $\text{NCH}_2\text{CH}_2$ ), 1.33 (m, 2H,  $\text{NCH}_2\text{CH}_2\text{CH}_2$ ), 0.93 (t,  $^3J_{\text{HH}} = 8$  Hz, 3H,  $\text{CH}_2\text{CH}_2\text{CH}_3$ ).  $^{13}\text{C}\{^1\text{H}\}$  NMR (100 MHz,  $\text{CDCl}_3$ ):  $\delta$  119.88 (CN), 117.79 (equivalent ring C), 117.52 (unique ring C), 55.44 ( $\text{NCH}_2$ ), 42.51 ( $\text{N}(\text{CH}_3)_2$ ), 40.31 ( $\text{NCH}_3$ ), 29.80 ( $\text{NCH}_2\text{CH}_2$ ), 19.83 ( $\text{NCH}_2\text{CH}_2\text{CH}_2$ ), 13.72 ( $\text{NCH}_2\text{CH}_2\text{CH}_2\text{CH}_3$ ). ESI MS:  $m/z$  210.1964 ( $\text{M}^+$ ). Anal. calcd for  $\text{C}_{14}\text{H}_{24}\text{N}_6 \cdot 0.4\text{H}_2\text{O}$ : C, 59.29; H, 8.81; N, 29.64. Found: C, 58.94; H, 8.99; N, 29.13. With water content of 1482 ppm.

Table 1S. Density data for TDAC DCA ILs.

| Compound                                                                                 | Density (g.cm <sup>-3</sup> ) |       |       |       |       |       |       |       |
|------------------------------------------------------------------------------------------|-------------------------------|-------|-------|-------|-------|-------|-------|-------|
|                                                                                          | 20 °C                         | 30 °C | 40 °C | 50 °C | 60 °C | 70 °C | 80 °C | 90 °C |
| [C <sub>3</sub> (NEt <sub>2</sub> ) <sub>3</sub> ]DCA ( <b>3b</b> )                      | 1.010                         | 1.004 | 0.998 | 0.992 | 0.985 | 0.979 | 0.973 | 0.967 |
| [C <sub>3</sub> (NPr <sub>2</sub> ) <sub>3</sub> ]DCA ( <b>3c</b> )                      | –                             | –     | –     | –     | 0.951 | 0.945 | 0.939 | 0.933 |
| [C <sub>3</sub> (NBu <sub>2</sub> ) <sub>3</sub> ]DCA ( <b>3d</b> )                      | 0.944                         | 0.938 | 0.932 | 0.926 | 0.920 | 0.914 | 0.908 | 0.902 |
| [C <sub>3</sub> (NPent <sub>2</sub> ) <sub>3</sub> ]DCA ( <b>3e</b> )                    | 0.927                         | 0.921 | 0.915 | 0.909 | 0.903 | 0.897 | 0.891 | 0.885 |
| [C <sub>3</sub> (NHex <sub>2</sub> ) <sub>3</sub> ]DCA ( <b>3f</b> )                     | 0.915                         | 0.909 | 0.903 | 0.897 | 0.891 | 0.885 | 0.879 | 0.873 |
| [C <sub>3</sub> (NDec <sub>2</sub> ) <sub>3</sub> ]DCA ( <b>3g</b> )                     | 0.890                         | 0.884 | 0.878 | 0.872 | 0.866 | 0.860 | 0.854 | 0.849 |
| [C <sub>3</sub> (NBuMe) <sub>3</sub> ]DCA ( <b>4a</b> )                                  | 0.983                         | 0.977 | 0.970 | 0.964 | 0.958 | 0.952 | 0.947 | 0.941 |
| [C <sub>3</sub> (NMe <sub>2</sub> ) <sub>2</sub> (NPrMe)]DCA ( <b>8a</b> )               | 1.045                         | 1.039 | 1.032 | 1.025 | 1.019 | 1.013 | 1.007 | 1.001 |
| [C <sub>3</sub> (NMe <sub>2</sub> ) <sub>2</sub> (NBuMe)]DCA ( <b>8b</b> )               | 1.032                         | 1.026 | 1.020 | 1.014 | 1.007 | 1.002 | 0.995 | 0.989 |
| [C <sub>3</sub> (NEt <sub>2</sub> ) <sub>2</sub> (NBuMe)]DCA ( <b>9a</b> )               | 0.999                         | 0.993 | 0.987 | 0.981 | 0.975 | 0.969 | 0.963 | 0.957 |
| [C <sub>3</sub> (NEt <sub>2</sub> ) <sub>2</sub> (NHexMe)]DCA ( <b>9b</b> )              | 0.984                         | 0.978 | 0.972 | 0.966 | 0.960 | 0.954 | 0.948 | 0.942 |
| [C <sub>3</sub> (NEt <sub>2</sub> ) <sub>2</sub> (NMe <sub>2</sub> )]DCA ( <b>10a</b> )  | 1.023                         | 1.017 | 1.010 | 1.004 | 0.998 | 0.992 | 0.986 | 0.980 |
| [C <sub>3</sub> (NEt <sub>2</sub> ) <sub>2</sub> (NBu <sub>2</sub> )]DCA ( <b>10b</b> )  | 0.980                         | 0.974 | 0.968 | 0.962 | 0.955 | 0.949 | 0.943 | 0.937 |
| [C <sub>3</sub> (NEt <sub>2</sub> ) <sub>2</sub> (NHex <sub>2</sub> )]DCA ( <b>10c</b> ) | 0.958                         | 0.952 | 0.946 | 0.939 | 0.933 | 0.927 | 0.922 | 0.916 |

Table 2S. Density fitting parameters for TDAC DCA ILs

| Compound   | $-b \times 10^{-4}$ | a      | $\alpha_p$<br>$-c \times 10^{-3}$ | d       |
|------------|---------------------|--------|-----------------------------------|---------|
| <b>3b</b>  | 6.123               | 1.1894 | 0.61941                           | 0.19165 |
| <b>3c</b>  | 5.989               | 1.1504 | 0.62790                           | 0.15875 |
| <b>3d</b>  | 5.953               | 1.1183 | 0.64493                           | 0.13148 |
| <b>3e</b>  | 5.973               | 1.1021 | 0.65911                           | 0.11772 |
| <b>3f</b>  | 5.962               | 1.0896 | 0.66694                           | 0.10675 |
| <b>3g</b>  | 5.958               | 1.0648 | 0.68532                           | 0.08475 |
| <b>4a</b>  | 5.980               | 1.1577 | 0.62198                           | 0.16475 |
| <b>8a</b>  | 6.315               | 1.2300 | 0.61084                           | 0.22508 |
| <b>8b</b>  | 6.181               | 1.2113 | 0.60912                           | 0.21035 |
| <b>9a</b>  | 6.025               | 1.1759 | 0.61584                           | 0.18005 |
| <b>9b</b>  | 5.929               | 1.1571 | 0.61587                           | 0.16397 |
| <b>10a</b> | 6.110               | 1.2016 | 0.61027                           | 0.20138 |
| <b>10b</b> | 6.145               | 1.1601 | 0.64110                           | 0.16789 |
| <b>10c</b> | 6.006               | 1.1335 | 0.64137                           | 0.14476 |

Table 3S. Molar volumes (mL mol<sup>-1</sup>) for TDAC DCA ILs

| Compound   | MW     | 293 K   | 303 K   | 313 K   | 323 K   | 333 K   | 343 K   | 353 K   | 363 K   |
|------------|--------|---------|---------|---------|---------|---------|---------|---------|---------|
| <b>3b</b>  | 318.47 | 315.28  | 317.23  | 319.20  | 321.18  | 323.18  | 325.19  | 327.21  | 329.25  |
| <b>3c</b>  | 402.63 | 412.96  | 415.56  | 418.16  | 420.79  | 423.45  | 426.12  | 428.82  | 431.51  |
| <b>3d</b>  | 486.79 | 515.65  | 518.99  | 522.33  | 525.71  | 529.10  | 532.52  | 535.98  | 539.49  |
| <b>3e</b>  | 570.95 | 615.72  | 619.83  | 623.89  | 628.00  | 632.16  | 636.35  | 640.57  | 644.82  |
| <b>3f</b>  | 655.12 | 715.96  | 720.74  | 725.51  | 730.36  | 735.25  | 740.19  | 745.16  | 750.18  |
| <b>3g</b>  | 991.76 | 1113.85 | 1121.61 | 1129.35 | 1137.05 | 1144.85 | 1152.72 | 1160.66 | 1168.66 |
| <b>4a</b>  | 360.55 | 366.97  | 369.21  | 371.52  | 373.85  | 376.19  | 378.54  | 380.90  | 383.28  |
| <b>8a</b>  | 262.36 | 251.06  | 252.51  | 254.22  | 255.96  | 257.47  | 258.99  | 260.54  | 262.10  |
| <b>8b</b>  | 276.39 | 267.82  | 269.38  | 270.97  | 272.57  | 274.46  | 275.83  | 277.77  | 279.46  |
| <b>9a</b>  | 332.49 | 332.66  | 334.71  | 336.77  | 338.85  | 340.94  | 343.05  | 345.18  | 347.31  |
| <b>9b</b>  | 360.55 | 366.58  | 368.83  | 371.11  | 373.40  | 375.71  | 378.04  | 380.37  | 382.72  |
| <b>10a</b> | 290.41 | 283.95  | 285.69  | 287.45  | 289.21  | 290.98  | 292.76  | 294.55  | 296.34  |
| <b>10b</b> | 374.58 | 382.19  | 384.62  | 387.08  | 389.56  | 392.07  | 394.60  | 397.15  | 399.72  |
| <b>10c</b> | 430.68 | 449.75  | 452.61  | 455.51  | 458.44  | 461.39  | 464.37  | 467.37  | 470.39  |

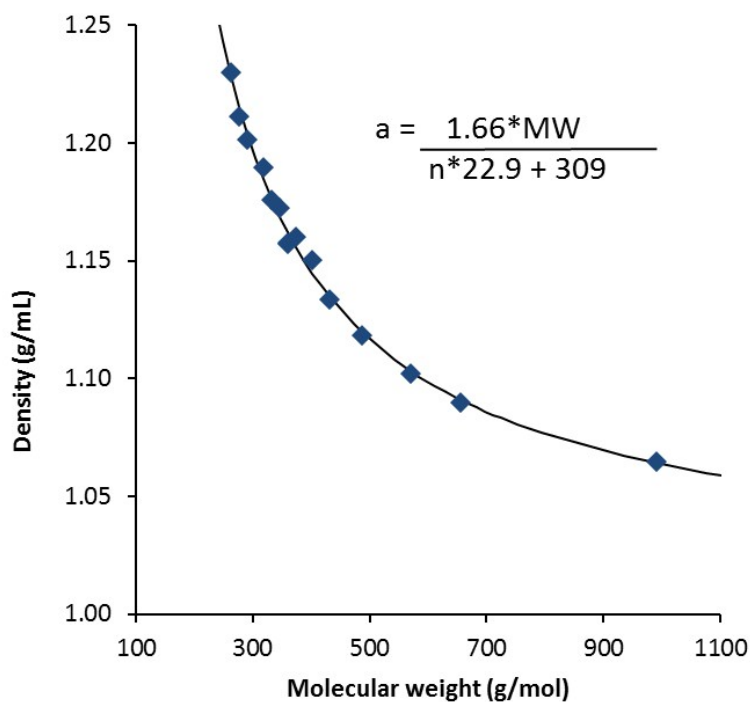

Fig. 1S. Density parameter a versus cation molecular weight for TDAC DCA ILs.

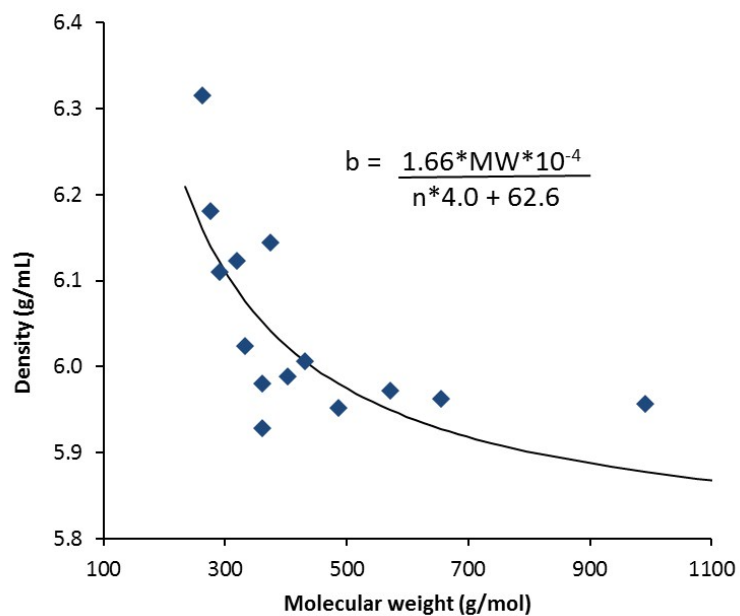

**Fig. 2S.** Density parameter  $b$  versus cation molecular weight for TDAC DCA ILs.

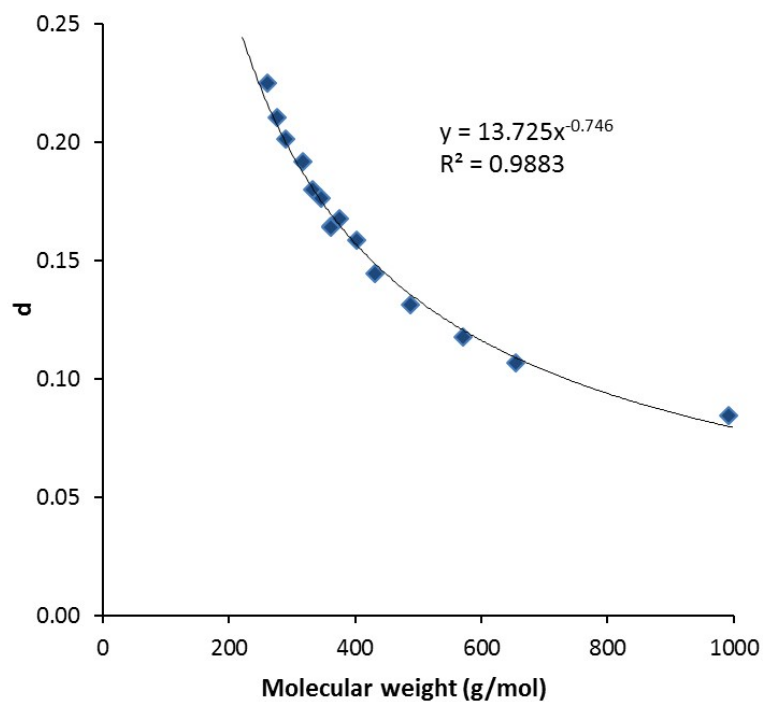

**Fig. 3S.**  $d$  (the intercept of  $\ln(\rho)$  vs  $T$  plots) versus molecular weight for TDAC DCA ILs.

Table 4S. Viscosity data for TDAC DCA ILs.

| Compound                                                                                 | Viscosity/cP     |       |       |                   |       |       |       |       |
|------------------------------------------------------------------------------------------|------------------|-------|-------|-------------------|-------|-------|-------|-------|
|                                                                                          | 293 K            | 303 K | 313 K | 323 K             | 333 K | 343 K | 353 K | 363 K |
| [C <sub>3</sub> (NEt <sub>2</sub> ) <sub>3</sub> ]DCA ( <b>3b</b> )                      | 64.2             | 41.9  | 28.3  | 19.9              | 14.6  | 11.4  | 8.9   | 7.1   |
| [C <sub>3</sub> (NPr <sub>2</sub> ) <sub>3</sub> ]DCA ( <b>3c</b> )                      | 107 <sup>a</sup> |       |       | 21.4 <sup>a</sup> | 14.6  | 10.2  | 7.5   | 5.7   |
| [C <sub>3</sub> (NBu <sub>2</sub> ) <sub>3</sub> ]DCA ( <b>3d</b> )                      | 293              | 160   | 95    | 60.6              | 41    | 29    | 21.5  | 16.4  |
| [C <sub>3</sub> (NPent <sub>2</sub> ) <sub>3</sub> ]DCA ( <b>3e</b> )                    | 308              | 168   | 97.9  | 60.9              | 40    | 27    | 19.8  | 14.4  |
| [C <sub>3</sub> (NHex <sub>2</sub> ) <sub>3</sub> ]DCA ( <b>3f</b> )                     | 332              | 183   | 109   | 69.4              | 47    | 32.9  | 23.5  | 17.8  |
| [C <sub>3</sub> (NDec <sub>2</sub> ) <sub>3</sub> ]DCA ( <b>3g</b> )                     | 554              | 291   | 163   | 97.5              | 62.3  | 41.6  | 28.9  | 20.8  |
| [C <sub>3</sub> (NBuMe) <sub>3</sub> ]DCA ( <b>4a</b> )                                  | 101              | 58.6  | 36.6  | 24.1              | 16.9  | 12.4  | 9.47  | 7.3   |
| [C <sub>3</sub> (NMe <sub>2</sub> ) <sub>2</sub> (NPrMe)]DCA ( <b>8a</b> )               | 107.3            | 61.3  | 38.2  | 25.1              | 17.5  | 12.8  | 10.1  | 8.02  |
| [C <sub>3</sub> (NMe <sub>2</sub> ) <sub>2</sub> (NBuMe)]DCA ( <b>8b</b> )               | 67.4             | 40.3  | 25.3  | 17.2              | 12.1  | 9.14  | 7.05  | 5.57  |
| [C <sub>3</sub> (NEt <sub>2</sub> ) <sub>2</sub> (NBuMe)]DCA ( <b>9a</b> )               | 73.7             | 45.8  | 30.2  | 20.8              | 15.3  | 11.5  | 8.9   | 7.1   |
| [C <sub>3</sub> (NEt <sub>2</sub> ) <sub>2</sub> (NHexMe)]DCA ( <b>9b</b> )              | 86.2             | 52.8  | 34.4  | 23.4              | 17    | 12.7  | 9.78  | 7.71  |
| [C <sub>3</sub> (NEt <sub>2</sub> ) <sub>2</sub> (NMe <sub>2</sub> )]DCA ( <b>10a</b> )  | 58.4             | 37.1  | 25.4  | 17.9              | 13.2  | 10    | 7.94  | 6.4   |
| [C <sub>3</sub> (NEt <sub>2</sub> ) <sub>2</sub> (NBu <sub>2</sub> )]DCA ( <b>10b</b> )  | 105              | 63.3  | 40.8  | 27.4              | 19.4  | 14.2  | 11    | 8.6   |
| [C <sub>3</sub> (NEt <sub>2</sub> ) <sub>2</sub> (NHex <sub>2</sub> )]DCA ( <b>10c</b> ) | 131              | 76.8  | 48.4  | 32                | 22.2  | 16    | 12    | 9.3   |

<sup>a</sup> Calculated based on 60–90 °C data.

Table 5S. Viscosity fit parameters for TDAC DCA ILs.

| Compound                                                                                 | Parameter |      |       |     |       |       |
|------------------------------------------------------------------------------------------|-----------|------|-------|-----|-------|-------|
|                                                                                          | $\eta_0$  | $B$  | $T_0$ | $D$ | $A$   | $E_a$ |
| [C <sub>3</sub> (NEt <sub>2</sub> ) <sub>3</sub> ]DCA ( <b>3b</b> )                      | 0.078     | 962  | 150   | 6.4 | 0.447 | 28.9  |
| [C <sub>3</sub> (NPr <sub>2</sub> ) <sub>3</sub> ]DCA ( <b>3c</b> )                      | 0.044     | 898  | 178   | 5.0 | 0.149 | 31.8  |
| [C <sub>3</sub> (NBu <sub>2</sub> ) <sub>3</sub> ]DCA ( <b>3d</b> )                      | 0.133     | 898  | 176   | 5.1 | 0.036 | 38.7  |
| [C <sub>3</sub> (NPent <sub>2</sub> ) <sub>3</sub> ]DCA ( <b>3e</b> )                    | 0.029     | 1318 | 151   | 8.7 | 0.017 | 40.6  |
| [C <sub>3</sub> (NHex <sub>2</sub> ) <sub>3</sub> ]DCA ( <b>3f</b> )                     | 0.075     | 1100 | 162   | 6.8 | 0.042 | 38.6  |
| [C <sub>3</sub> (NDec <sub>2</sub> ) <sub>3</sub> ]DCA ( <b>3g</b> )                     | 0.024     | 1445 | 149   | 9.7 | 0.009 | 43.7  |
| [C <sub>3</sub> (NBuMe) <sub>3</sub> ]DCA ( <b>4a</b> )                                  | 0.079     | 863  | 173   | 5.0 | 0.057 | 35.0  |
| [C <sub>3</sub> (NMe <sub>2</sub> ) <sub>2</sub> (NPrMe)]DCA ( <b>8a</b> )               | 0.132     | 731  | 184   | 4.0 | 0.051 | 35.4  |
| [C <sub>3</sub> (NMe <sub>2</sub> ) <sub>2</sub> (NBuMe)]DCA ( <b>8b</b> )               | 0.089     | 766  | 178   | 4.3 | 0.073 | 33.4  |
| [C <sub>3</sub> (NEt <sub>2</sub> ) <sub>2</sub> (NBuMe)]DCA ( <b>9a</b> )               | 0.096     | 856  | 164   | 5.2 | 0.231 | 30.8  |
| [C <sub>3</sub> (NEt <sub>2</sub> ) <sub>2</sub> (NHexMe)]DCA ( <b>9b</b> )              | 0.091     | 882  | 164   | 5.4 | 0.179 | 31.8  |
| [C <sub>3</sub> (NEt <sub>2</sub> ) <sub>2</sub> (NMe <sub>2</sub> )]DCA ( <b>10a</b> )  | 0.097     | 848  | 161   | 5.3 | 0.386 | 29.0  |
| [C <sub>3</sub> (NEt <sub>2</sub> ) <sub>2</sub> (NBu <sub>2</sub> )]DCA ( <b>10b</b> )  | 0.070     | 980  | 159   | 6.2 | 0.127 | 33.2  |
| [C <sub>3</sub> (NEt <sub>2</sub> ) <sub>2</sub> (NHex <sub>2</sub> )]DCA ( <b>10c</b> ) | 0.053     | 1063 | 157   | 6.8 | 0.076 | 34.9  |



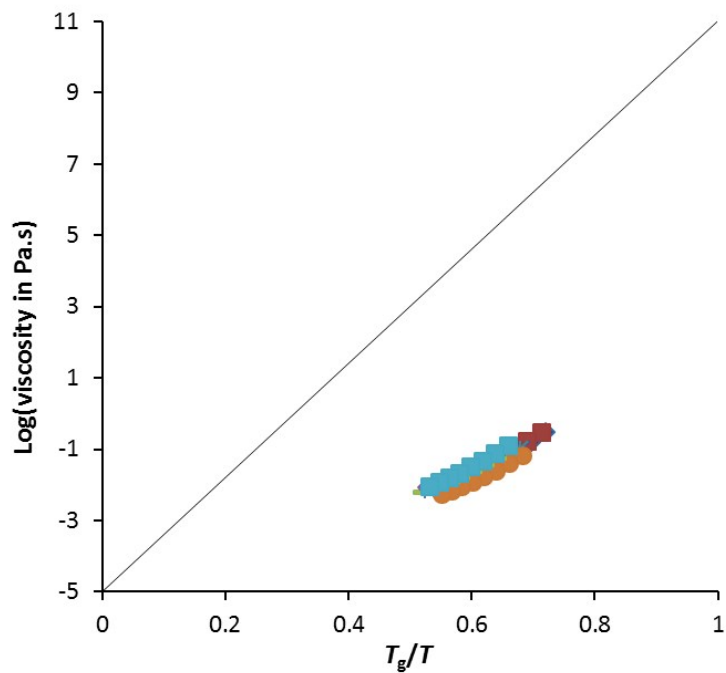

**Fig. 4S.** Fragility plot for TDAC DCA ILs.

**Table 6S.** Viscosities of non-TDAC cations with DCA.

| Cation <sup>a</sup>  | MW (g/mol) | Viscosity at 20 °C (cP) | Reference |
|----------------------|------------|-------------------------|-----------|
| C <sub>1</sub> mim   | 163.2      | 18.6                    | 1         |
| C <sub>2</sub> mim   | 177.2      | 19.1                    | 1         |
| C <sub>4</sub> mim   | 205.3      | 36.7                    | 1         |
| C <sub>6</sub> mim   | 233.3      | 59.9                    | 1         |
| 1-Me-2-Et-Pyrazolium | 177.2      | 29.8                    | 1         |
| Me <sub>3</sub> S    | 143.2      | 27.2                    | 2         |
| MeEt <sub>2</sub> S  | 171.3      | 22.9                    | 2         |
| MePr <sub>2</sub> S  | 199.3      | 29.5                    | 2         |
| MeBu <sub>2</sub> S  | 227.4      | 60.0                    | 2         |
| EtMe <sub>2</sub> S  | 157.2      | 25.3                    | 2         |
| Et <sub>3</sub> S    | 185.3      | 20.9                    | 2         |
| EtPr <sub>2</sub> S  | 213.3      | 29.4                    | 2         |
| EtBu <sub>2</sub> S  | 241.4      | 51.7                    | 2         |
| PY <sub>12</sub>     | 180.3      | 30.3                    | 1         |
| PY <sub>13</sub>     | 194.3      | 45                      | 3         |
| PY <sub>14</sub>     | 208.3      | 50                      | 3         |
| PY <sub>16</sub>     | 236.4      | 45                      | 3         |

<sup>a</sup> mim = methylimidazolium; PY = pyrrolidinium

Table 7S. Conductivity data for TDAC DCA ILs.

| Compound                                                                                 | Conductivity/mS.cm <sup>-1</sup> |       |       |       |       |       |       |        |
|------------------------------------------------------------------------------------------|----------------------------------|-------|-------|-------|-------|-------|-------|--------|
|                                                                                          | 293 K                            | 303 K | 313 K | 323 K | 333 K | 343 K | 353 K | 363 K  |
| [C <sub>3</sub> (NEt <sub>2</sub> ) <sub>3</sub> ]DCA ( <b>3b</b> )                      | 4.688                            | 6.797 | 9.199 | 11.97 | 15.14 | 18.63 | 22.4  | 26.33  |
| [C <sub>3</sub> (NPr <sub>2</sub> ) <sub>3</sub> ]DCA ( <b>3c</b> )                      |                                  |       |       |       | 5.87  | 8.02  | 10.48 | 13.25  |
| [C <sub>3</sub> (NBu <sub>2</sub> ) <sub>3</sub> ]DCA ( <b>3d</b> )                      | 0.624                            | 1.158 | 1.892 | 2.886 | 4.161 | 5.73  | 7.576 | 9.684  |
| [C <sub>3</sub> (NPent <sub>2</sub> ) <sub>3</sub> ]DCA ( <b>3e</b> )                    | 0.295                            | 0.543 | 0.914 | 1.439 | 2.14  | 3.03  | 4.12  | 5.4    |
| [C <sub>3</sub> (NHex <sub>2</sub> ) <sub>3</sub> ]DCA ( <b>3f</b> )                     | 0.161                            | 0.26  | 0.414 | 0.62  | 0.891 | 1.228 | 1.644 | 2.129  |
| [C <sub>3</sub> (NDec <sub>2</sub> ) <sub>3</sub> ]DCA ( <b>3g</b> )                     | 0.022                            | 0.043 | 0.078 | 0.13  | 0.205 | 0.307 | 0.44  | 0.61   |
| [C <sub>3</sub> (NBuMe) <sub>3</sub> ]DCA ( <b>4a</b> )                                  | 1.92                             | 3.09  | 4.56  | 6.35  | 8.48  | 10.9  | 13.62 | 16.6   |
| [C <sub>3</sub> (NMe <sub>2</sub> ) <sub>2</sub> (NPrMe)]DCA ( <b>8a</b> )               | 3.17                             | 5.42  | 8.44  | 12.38 | 16.9  | 22.5  | 28.3  | 35.0   |
| [C <sub>3</sub> (NMe <sub>2</sub> ) <sub>2</sub> (NBuMe)]DCA ( <b>8b</b> )               | 4.38                             | 7.13  | 10.69 | 15.09 | 20.5  | 26.3  | 32.7  | 39.6   |
| [C <sub>3</sub> (NEt <sub>2</sub> ) <sub>2</sub> (NBuMe)]DCA ( <b>9a</b> )               | 3.501                            | 5.119 | 7.134 | 9.503 | 12.2  | 15.24 | 18.6  | 22.16  |
| [C <sub>3</sub> (NEt <sub>2</sub> ) <sub>2</sub> (NHexMe)]DCA ( <b>9b</b> )              | 2.77                             | 4.34  | 6.34  | 8.82  | 11.75 | 15.13 | 18.88 | 23.15  |
| [C <sub>3</sub> (NEt <sub>2</sub> ) <sub>2</sub> (NMe <sub>2</sub> )]DCA ( <b>10a</b> )  | 4.643                            | 6.969 | 9.537 | 12.44 | 15.7  | 19.25 | 23.13 | 27.21  |
| [C <sub>3</sub> (NEt <sub>2</sub> ) <sub>2</sub> (NBu <sub>2</sub> )]DCA ( <b>10b</b> )  | 2.203                            | 3.424 | 4.912 | 6.703 | 8.794 | 11.16 | 13.82 | 16.71  |
| [C <sub>3</sub> (NEt <sub>2</sub> ) <sub>2</sub> (NHex <sub>2</sub> )]DCA ( <b>10c</b> ) | 1.028                            | 1.71  | 2.572 | 3.641 | 4.939 | 6.463 | 8.21  | 10.164 |

Table 8S. Conductivity fit data for TDAC DCA ILs.

| Compound                                                                                 | Parameter         |      |       |     |          |        |       |          |
|------------------------------------------------------------------------------------------|-------------------|------|-------|-----|----------|--------|-------|----------|
|                                                                                          | $\sigma_{\infty}$ | $B$  | $T_0$ | $D$ | $\delta$ | $A$    | $E_a$ | $\delta$ |
| [C <sub>3</sub> (NEt <sub>2</sub> ) <sub>3</sub> ]DCA ( <b>3b</b> )                      | 489               | 551  | 174   | 3.2 | 0.0266   | 21644  | 20204 | 0.424    |
| [C <sub>3</sub> (NPr <sub>2</sub> ) <sub>3</sub> ]DCA ( <b>3c</b> )                      | 376               | 514  | 210   | 2.4 | 0.0034   | 94644  | 26776 | 0.100    |
| [C <sub>3</sub> (NBu <sub>2</sub> ) <sub>3</sub> ]DCA ( <b>3d</b> )                      | 605               | 730  | 187   | 3.9 | 0.0079   | 186853 | 29741 | 0.156    |
| [C <sub>3</sub> (NPent <sub>2</sub> ) <sub>3</sub> ]DCA ( <b>3e</b> )                    | 668               | 895  | 177   | 5.0 | 0.0048   | 267153 | 32583 | 0.086    |
| [C <sub>3</sub> (NHex <sub>2</sub> ) <sub>3</sub> ]DCA ( <b>3f</b> )                     | 489               | 1175 | 147   | 8.0 | 0.0033   | 51825  | 30452 | 0.025    |
| [C <sub>3</sub> (NDec <sub>2</sub> ) <sub>3</sub> ]DCA ( <b>3g</b> )                     | 419               | 1353 | 156   | 8.7 | 0.0009   | 271183 | 39112 | 0.005    |
| [C <sub>3</sub> (NBuMe) <sub>3</sub> ]DCA ( <b>4a</b> )                                  | 441               | 580  | 186   | 3.1 | 0.0108   | 56048  | 24467 | 0.307    |
| [C <sub>3</sub> (NMe <sub>2</sub> ) <sub>2</sub> (NPrMe)]DCA ( <b>8a</b> )               | 904               | 535  | 198   | 2.7 | 0.0717   | 234232 | 26522 | 0.775    |
| [C <sub>3</sub> (NMe <sub>2</sub> ) <sub>2</sub> (NBuMe)]DCA ( <b>8b</b> )               | 808               | 499  | 198   | 2.5 | 0.0771   | 141550 | 24623 | 0.900    |
| [C <sub>3</sub> (NEt <sub>2</sub> ) <sub>2</sub> (NBuMe)]DCA ( <b>9a</b> )               | 556               | 619  | 171   | 3.6 | 0.0107   | 29307  | 21642 | 0.348    |
| [C <sub>3</sub> (NEt <sub>2</sub> ) <sub>2</sub> (NHexMe)]DCA ( <b>9b</b> )              | 742               | 642  | 178   | 3.6 | 0.0082   | 112681 | 25476 | 0.298    |
| [C <sub>3</sub> (NEt <sub>2</sub> ) <sub>2</sub> (NMe <sub>2</sub> )]DCA ( <b>10a</b> )  | 382               | 464  | 188   | 2.5 | 0.0580   | 22792  | 20258 | 0.501    |
| [C <sub>3</sub> (NEt <sub>2</sub> ) <sub>2</sub> (NBu <sub>2</sub> )]DCA ( <b>10b</b> )  | 452               | 608  | 179   | 3.4 | 0.0080   | 38131  | 23288 | 0.283    |
| [C <sub>3</sub> (NEt <sub>2</sub> ) <sub>2</sub> (NHex <sub>2</sub> )]DCA ( <b>10c</b> ) | 459               | 718  | 175   | 4.1 | 0.0008   | 55828  | 25942 | 0.172    |

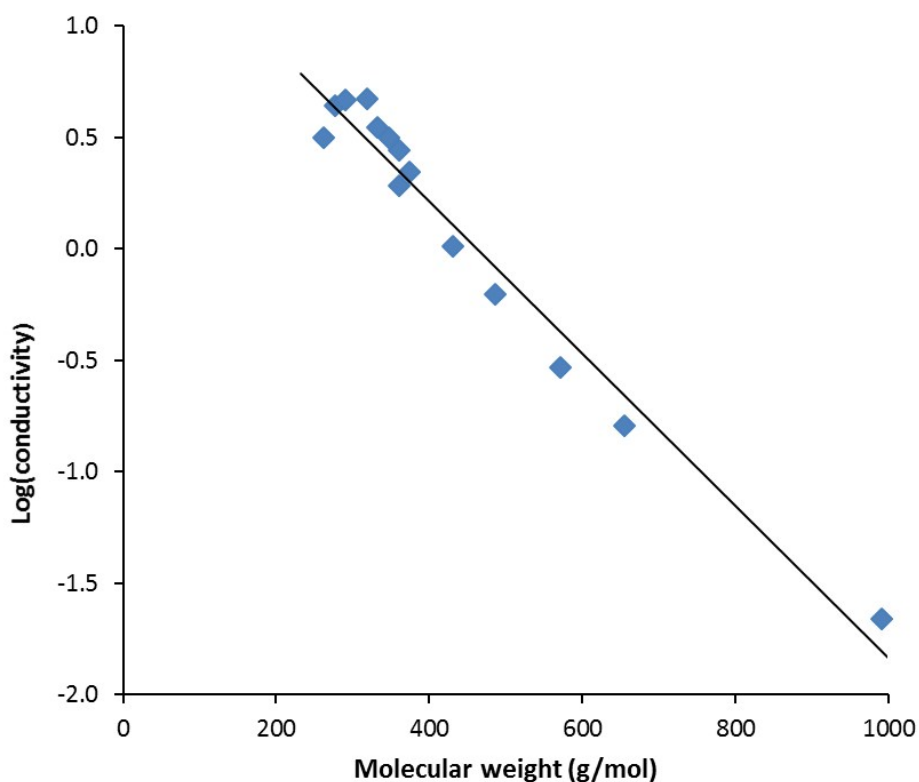

**Fig. 5S.** Plot of Log(conductivity) versus MW with a linear fit.

Table 9S. Walden parameters for TDAC DCA ILs.

| Compound                                                               | Average $\Delta W$ | Slope |
|------------------------------------------------------------------------|--------------------|-------|
| $[\text{C}_3(\text{NEt}_2)_3]\text{DCA}$ ( <b>3b</b> )                 | 0.12               | 0.799 |
| $[\text{C}_3(\text{NPr}_2)_3]\text{DCA}$ ( <b>3c</b> )                 | 0.46               | 0.886 |
| $[\text{C}_3(\text{NBu}_2)_3]\text{DCA}$ ( <b>3d</b> )                 | 0.04               | 0.950 |
| $[\text{C}_3(\text{NPent}_2)_3]\text{DCA}$ ( <b>3e</b> )               | 0.27               | 0.964 |
| $[\text{C}_3(\text{NHex}_2)_3]\text{DCA}$ ( <b>3f</b> )                | 0.50               | 0.905 |
| $[\text{C}_3(\text{NDec}_2)_3]\text{DCA}$ ( <b>3g</b> )                | 0.84               | 1.027 |
| $[\text{C}_3(\text{NBuMe})_3]\text{DCA}$ ( <b>4a</b> )                 | 0.25               | 0.835 |
| $[\text{C}_3(\text{NMe}_2)_2(\text{NPrMe})]\text{DCA}$ ( <b>8a</b> )   | 0.10               | 0.937 |
| $[\text{C}_3(\text{NMe}_2)_2(\text{NBuMe})]\text{DCA}$ ( <b>8b</b> )   | 0.16               | 0.899 |
| $[\text{C}_3(\text{NEt}_2)_2(\text{NBuMe})]\text{DCA}$ ( <b>9a</b> )   | 0.18               | 0.807 |
| $[\text{C}_3(\text{NEt}_2)_2(\text{NHexMe})]\text{DCA}$ ( <b>9b</b> )  | 0.11               | 0.898 |
| $[\text{C}_3(\text{NEt}_2)_2(\text{NMe}_2)]\text{DCA}$ ( <b>10a</b> )  | 0.20               | 0.810 |
| $[\text{C}_3(\text{NEt}_2)_2(\text{NBu}_2)]\text{DCA}$ ( <b>10b</b> )  | 0.15               | 0.822 |
| $[\text{C}_3(\text{NEt}_2)_2(\text{NHex}_2)]\text{DCA}$ ( <b>10c</b> ) | 0.28               | 0.875 |

## X-ray crystallography

Single crystals of **3a** and **3c** formed in the neat liquid. A suitable crystal of each was selected and mounted on a SuperNova, Dual, Cu at zero, Atlas diffractometer. Using Olex2,<sup>4</sup> the structure was solved with the XS structure solution program<sup>5</sup> using Direct Methods and refined with the XL refinement package<sup>5</sup> using Least Squares minimisation.

Table 10S. Crystallographic data for **3a.H<sub>2</sub>O** and **3c**.

|                                                     | <b>3a.H<sub>2</sub>O</b>                                          | <b>3c</b>                                                         |
|-----------------------------------------------------|-------------------------------------------------------------------|-------------------------------------------------------------------|
| Empirical formula                                   | C <sub>11</sub> H <sub>20</sub> N <sub>6</sub> O                  | C <sub>23</sub> H <sub>42</sub> N <sub>6</sub>                    |
| Formula weight                                      | 252.33                                                            | 402.63                                                            |
| Temperature (K)                                     | 120.01(10)                                                        | 296(2)                                                            |
| Crystal system                                      | Monoclinic                                                        | Monoclinic                                                        |
| Space group                                         | <i>C2/c</i>                                                       | <i>C2/c</i>                                                       |
| <i>a</i> (Å)                                        | 23.2120(4)                                                        | 21.8840(7) Å                                                      |
| <i>b</i> (Å)                                        | 9.00560(10)                                                       | 9.4228(3) Å                                                       |
| <i>c</i> (Å)                                        | 13.5409(2)                                                        | 27.0076(11) Å                                                     |
| $\alpha$ (°)                                        | 90                                                                | 90°                                                               |
| $\beta$ (°)                                         | 104.386(2)                                                        | 113.472(2)°                                                       |
| $\gamma$ (°)                                        | 90                                                                | 90°                                                               |
| Volume (Å <sup>3</sup> )                            | 2741.81(7)                                                        | 5108.4(3)                                                         |
| <i>Z</i>                                            | 8                                                                 | 8                                                                 |
| Density (calculated) (mg mm <sup>-3</sup> )         | 1.223                                                             | 1.047                                                             |
| Absorption coefficient (mm <sup>-1</sup> )          | 0.684                                                             | 0.064                                                             |
| <i>F</i> (000)                                      | 1088                                                              | 1776                                                              |
| Crystal size (mm <sup>3</sup> )                     | 0.307 × 0.27 × 0.098                                              | 0.51 × 0.50 × 0.38                                                |
| Theta range for data collection                     | 3.932 to 76.824°                                                  | 3.3 to 55.0°                                                      |
| Index ranges                                        | -29 ≤ <i>h</i> ≤ 29<br>-11 ≤ <i>k</i> ≤ 11<br>-16 ≤ <i>l</i> ≤ 17 | -28 ≤ <i>h</i> ≤ 28<br>-12 ≤ <i>k</i> ≤ 12<br>-35 ≤ <i>l</i> ≤ 35 |
| Reflections collected                               | 29797                                                             | 55815                                                             |
| Independent reflections                             | 2881 [ <i>R</i> (int) = 0.0292]                                   | 5876 [ <i>R</i> (int) = 0.0447]                                   |
| Data / restraints / parameters                      | 2881 / 2 / 175                                                    | 5876 / 0 / 297                                                    |
| Goodness-of-fit on <i>F</i> <sup>2</sup>            | 1.078                                                             | 1.160                                                             |
| Final <i>R</i> indexes [ <i>I</i> ≥ 2σ( <i>I</i> )] | <i>R</i> <sub>1</sub> = 0.0373, <i>wR</i> <sub>2</sub> = 0.1079   | <i>R</i> <sub>1</sub> = 0.0444, <i>wR</i> <sub>2</sub> = 0.1369   |
| Final <i>R</i> indexes (all data)                   | <i>R</i> <sub>1</sub> = 0.0398, <i>wR</i> <sub>2</sub> = 0.1103   | <i>R</i> <sub>1</sub> = 0.0744, <i>wR</i> <sub>2</sub> = 0.1665   |
| Largest diff. peak/hole (e Å <sup>-3</sup> )        | 0.293/-0.365                                                      | 0.340, -0.475                                                     |

Table 11S. Bond lengths (Å) and angles (°) for  $[C_3(NMe_2)_3]DCA \cdot H_2O$  (**3a**·H<sub>2</sub>O).

|            |            |           |            |
|------------|------------|-----------|------------|
| C1–C2      | 1.3801(13) | N1–C1     | 1.3274(12) |
| C1–C3      | 1.3833(13) | N2–C2     | 1.3305(12) |
| C2–C3      | 1.3813(13) | N3–C3     | 1.3235(13) |
| N1–C4      | 1.4566(12) | N1–C5     | 1.4595(12) |
| N2–C6      | 1.4562(13) | N2–C7     | 1.4576(12) |
| N3–C8      | 1.4544(12) | N3–C9     | 1.4552(12) |
| N5–C10     | 1.3073(14) | N4–C10    | 1.1580(14) |
| N5–C11     | 1.3065(14) | N6–C11    | 1.1583(14) |
| O1–H1A     | 0.862(13)  | H1A---N4  | 2.027(14)  |
| O1–H1B     | 0.868(13)  | H1B---N6  | 2.092(14)  |
| C2–C1–C3   | 59.98(6)   | C1–N1–C5  | 119.34(8)  |
| N1–C1–C2   | 148.97(9)  | C1–N1–C4  | 121.20(8)  |
| N1–C1–C3   | 151.00(9)  | C4–N1–C5  | 118.22(7)  |
| C1–C2–C3   | 60.12(6)   | C2–N2–C6  | 119.12(8)  |
| N2–C2–C1   | 148.68(9)  | C2–N2–C7  | 120.93(8)  |
| N2–C2–C3   | 151.04(9)  | C6–N2–C7  | 118.74(8)  |
| C2–C3–C1   | 59.89(7)   | C3–N3–C9  | 122.09(8)  |
| N3–C3–C1   | 150.30(9)  | C3–N3–C8  | 121.13(8)  |
| N3–C3–C2   | 149.80(9)  | C8–N3–C9  | 116.77(8)  |
| C11–N5–C10 | 121.41(9)  | N6–C11–N5 | 173.45(11) |
| H1A–O1–H1B | 106.2(15)  | N4–C10–N5 | 173.31(10) |
| O1–H1A–N4  | 173.8(2)   | O1–H1B–N6 | 168.8(2)   |

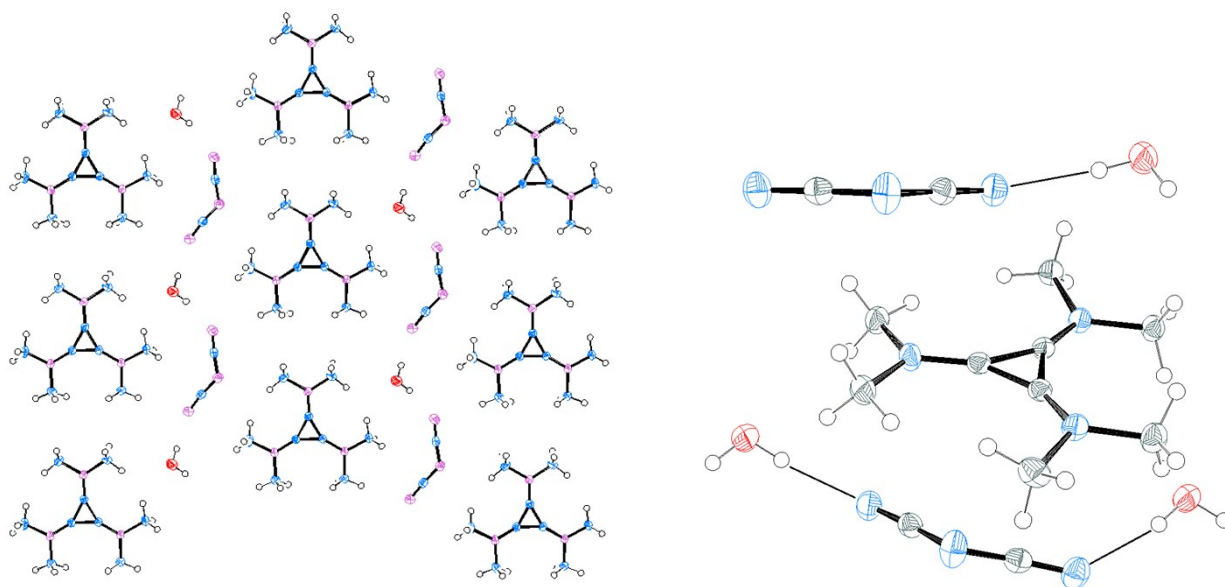

Fig. 6S. Illustration of one layer of **3a**·H<sub>2</sub>O and the cation environment.

Table 12S. Bond lengths for [C<sub>3</sub>(NPr<sub>2</sub>)<sub>3</sub>]DCA (**3c**).

| Bond |    |            | Length/Å |    |            | Bond |    |            | Length/Å |    |            |    |    |            |    |    |            |    |      |            |    |      |            |    |      |            |    |      |            |    |      |            |    |      |          |    |       |          |      |      |            |      |      |          |      |      |            |      |      |          |      |      |            |      |      |          |      |      |          |      |      |           |      |      |          |       |       |          |      |      |          |       |       |          |      |      |          |      |      |          |    |    |          |    |    |          |    |    |          |    |    |            |
|------|----|------------|----------|----|------------|------|----|------------|----------|----|------------|----|----|------------|----|----|------------|----|------|------------|----|------|------------|----|------|------------|----|------|------------|----|------|------------|----|------|----------|----|-------|----------|------|------|------------|------|------|----------|------|------|------------|------|------|----------|------|------|------------|------|------|----------|------|------|----------|------|------|-----------|------|------|----------|-------|-------|----------|------|------|----------|-------|-------|----------|------|------|----------|------|------|----------|----|----|----------|----|----|----------|----|----|----------|----|----|------------|
| C1   | C2 | 1.3801(18) | N1       | C1 | 1.3301(17) | C1   | C3 | 1.3738(19) | N2       | C2 | 1.3286(17) | C2 | C3 | 1.3752(19) | N3 | C3 | 1.3266(18) | N1 | C11a | 1.4703(17) | N1 | C12a | 1.4649(17) | N2 | C21a | 1.4669(18) | N2 | C22a | 1.4635(18) | N3 | C31a | 1.4760(18) | N3 | C32a | 1.538(6) | N3 | C32a- | 1.496(3) | C11b | C11a | 1.5188(18) | C31b | C31a | 1.520(2) | C11b | C11c | 1.5187(19) | C31b | C31c | 1.519(2) | C12a | C12b | 1.5194(18) | C32a | C32b | 1.508(9) | C12b | C12c | 1.512(2) | C32b | C32c | 1.551(13) | C21a | C21b | 1.514(2) | C32a- | C32b- | 1.515(3) | C21b | C21c | 1.517(3) | C32b- | C32c- | 1.508(5) | C22a | C22b | 1.511(2) | C22b | C22c | 1.528(2) | N4 | C4 | 1.305(2) | C5 | N4 | 1.311(2) | C4 | N5 | 1.143(2) | C5 | N6 | 1.1546(19) |

Table 13S. Bond angles for [C<sub>3</sub>(NPr<sub>2</sub>)<sub>3</sub>]DCA (**3c**).

|      |      |      |            |       |       |       |            |
|------|------|------|------------|-------|-------|-------|------------|
| C3   | C1   | C2   | 59.92(10)  | N2    | C2    | C3    | 149.86(13) |
| C3   | C2   | C1   | 59.81(10)  | N2    | C2    | C1    | 150.25(13) |
| C1   | C3   | C2   | 60.27(9)   | N3    | C3    | C1    | 150.02(14) |
| N1   | C1   | C3   | 150.07(13) | N3    | C3    | C2    | 149.69(13) |
| N1   | C1   | C2   | 149.92(13) | C2    | N2    | C22a  | 120.93(12) |
| C1   | N1   | C12a | 120.51(11) | C2    | N2    | C21a  | 120.75(11) |
| C1   | N1   | C11a | 120.57(11) | C22a  | N2    | C21a  | 117.93(11) |
| C12a | N1   | C11a | 118.35(10) | C3    | N3    | C32a- | 118.39(13) |
| C3   | N3   | C31a | 119.51(12) | C31a  | N3    | C32a  | 113.7(2)   |
| C3   | N3   | C32a | 123.0(2)   | C31a  | N3    | C32a- | 118.80(12) |
| N1   | C11a | C11b | 113.25(11) | C22a  | C22b  | C22c  | 111.32(15) |
| C11c | C11b | C11a | 111.85(11) | N3    | C31a  | C31b  | 112.50(12) |
| N1   | C12a | C12b | 113.59(11) | C31c  | C31b  | C31a  | 111.11(12) |
| C12c | C12b | C12a | 111.96(12) | C32b  | C32a  | N3    | 102.8(4)   |
| N2   | C21a | C21b | 112.80(13) | C32a  | C32b  | C32c  | 111.0(6)   |
| C21a | C21b | C21c | 111.05(15) | N3    | C32a- | C32b- | 110.60(19) |
| N2   | C22a | C22b | 112.57(12) | C32c- | C32b- | C32a- | 110.7(2)   |
| N5   | C4   | N4   | 174.36(19) | C4    | N4    | C5    | 119.16(13) |
| N6   | C5   | N4   | 173.29(16) |       |       |       |            |

## References

1. Yukihiro Yoshida, Osamu Baba, and Gunzi Saito, *J. Phys. Chem. B*, **2007**, 111, 4742–4749.
2. Dirk Gerhard, Samim Cenk Alpaslan, Heiner Jakob Gores, Marc Uerdingenc and Peter Wasserscheid, *Chem. Commun.*, **2005**, 5080–5082.
3. D. R. MacFarlane, S. A. Forsyth, J. Golding and G. B. Deacon, *Green Chemistry*, **2002**, 4, 444–448.
4. O. V. Dolomanov, L. J. Bourhis, R. J. Gildea, J. A. K. Howard and H. Puschmann, *J. Appl. Cryst.*, 2009, **42**, 339.
5. G.M. Sheldrick, *Acta Cryst.*, 2008, **A64**, 112.
